# Supplementary material
Source: PubMed Central journal article supplement (PMC3086062)
Supplement: NIHMS286426-supplement-1.pdf [file NIHMS286426-supplement-1.pdf]

**SUPPLEMENTARY APPENDIX TABLES FOR WEB-ONLY PUBLICATION**

**Supplementary Appendix Table 1. Spearman Correlations of Lipid, Metabolic, and Inflammatory Variables with HDL-C and its Apolipoproteins.**

|                             | Non-diabetic<br>(N=803) |        |         | Type 2 Diabetic<br>(N=611) |        |         |
|-----------------------------|-------------------------|--------|---------|----------------------------|--------|---------|
|                             | HDL-C                   | ApoA-I | ApoA-II | HDL-C                      | ApoA-I | ApoA-II |
| HDL-cholesterol (HDL-C)     | -                       | 0.83‡  | 0.50‡   | -                          | 0.78‡  | 0.41‡   |
| Apolipoprotein A-I (ApoA-I) | -                       | -      | 0.54‡   | -                          | -      | 0.44‡   |
| Total cholesterol           | 0.21‡                   | 0.26‡  | 0.29‡   | 0.18‡                      | 0.22‡  | 0.28‡   |
| Triglycerides               | -0.44‡                  | -0.19‡ | 0.03    | -0.47‡                     | -0.19‡ | 0.09*   |
| LDL-cholesterol             | -0.02                   | 0.00   | 0.09†   | 0.02                       | 0.01   | 0.11†   |
| Apolipoprotein B            | -0.21‡                  | -0.01  | 0.10†   | -0.21‡                     | -0.06  | 0.07    |
| Non-HDL-cholesterol         | -0.17‡                  | -0.07  | 0.09†   | -0.19‡                     | -0.07  | 0.12†   |
| Systolic blood pressure     | -0.14‡                  | -0.07  | 0.05    | -0.10*                     | -0.05  | -0.06   |
| Body mass index             | -0.28‡                  | -0.19‡ | -0.10†  | -0.18‡                     | -0.07  | -0.01   |

|                     |        |        |        |        |        |        |
|---------------------|--------|--------|--------|--------|--------|--------|
| Waist circumference | -0.44‡ | -0.33‡ | -0.16‡ | -0.29‡ | -0.17‡ | -0.03  |
| Leptin              | 0.20‡  | 0.29‡  | 0.21‡  | 0.06   | 0.17‡  | 0.04   |
| Adiponectin         | 0.53‡  | 0.46‡  | 0.21‡  | 0.40‡  | 0.21‡  | 0.19‡  |
| HOMA-IR             | -0.33‡ | -0.19‡ | -0.04  | -0.32‡ | -0.11† | -0.07  |
| Hs-CRP              | -0.04  | 0.08*  | 0.12‡  | -0.11† | 0.00   | -0.16‡ |

HOMA-IR = homeostasis model assessment of insulin resistance. Hs-CRP = high-sensitivity C-reactive protein. \*p<0.05, †p<0.01, ‡p<0.001.

**Supplementary Appendix Table 2. Strongest Individual Confounders Beyond Age and Sex of the Associations of HDL-C and ApoA-I with CAC.**

| <b>Variables adjusted for</b> | <b>Non-diabetic Ratio (95% CI)<br/>(N=803)</b> | <b>Type 2 Diabetic Ratio (95% CI)<br/>(N=611)</b> |
|-------------------------------|------------------------------------------------|---------------------------------------------------|
| <b>HDL-C</b>                  |                                                |                                                   |
| Age, Sex                      | 0.72 (0.59-0.88), p=0.001                      | 0.58 (0.44-0.77), p<0.001                         |
| Age, Sex, Triglycerides       | 0.84 (0.68-1.04), p=0.11                       | 0.68 (0.49-0.94), p=0.02                          |
| Age, Sex, Body mass index     | 0.86 (0.70-1.05), p=0.13                       | 0.63 (0.47-0.84), p=0.002                         |
| Age, Sex, Waist circumference | 0.85 (0.70-1.05), p=0.13                       | 0.64 (0.47-0.85), p=0.003                         |
| Age, Sex, HOMA-IR             | 0.86 (0.70-1.06), p=0.15                       | 0.66 (0.47-0.91), p=0.01                          |
| <b>ApoA-I</b>                 |                                                |                                                   |
| Age, Sex                      | 0.79 (0.66-0.94), p=0.01                       | 0.64 (0.45-0.90), p=0.01                          |
| Age, Sex, Triglycerides       | 0.71 (0.50-1.00), p=0.05                       | 0.83 (0.69-0.99), p=0.04                          |
| Age, Sex, Body mass index     | 0.86 (0.72-1.03), p=0.10                       | 0.68 (0.48-0.95), p=0.03                          |
| Age, Sex, Waist circumference | 0.86 (0.72-1.03), p=0.10                       | 0.68 (0.49-0.97), p=0.03                          |
| Age, Sex, HOMA-IR             | 0.88 (0.74-1.06), p=0.18                       | 0.67 (0.47-0.94), p=0.02                          |

Results of Tobit regression are presented as the ratio of increase in coronary calcium score for one standard deviation increase in HDL-C (14.70 mg/dl) or apoA-I (26.16 mg/dl); standard deviation for pooled cohort standardizes comparison across diabetes status. For homeostasis model assessment of insulin resistance (HOMA-IR), type 2 diabetic subjects on insulin were excluded from analysis, yielding N=513 for type 2 diabetic group analyses.
